1 **Modality-specific dysfunctional neural processing of social-abstract and non-social-**  
2 **concrete information in schizophrenia**

3

4 Yifei He<sup>1,4\*</sup>, Miriam Steines<sup>1,4</sup>, Gebhard Sammer<sup>2</sup>, Arne Nagels<sup>3</sup>, Tilo Kircher<sup>1,4</sup>, Benjamin  
5 Straube<sup>1,4</sup>

6

7 1. Department of Psychiatry and Psychotherapy, Philipps-University Marburg, Marburg,  
8 Germany

9 2. Cognitive Neuroscience at Centre for Psychiatry, Justus-Liebig University Giessen,  
10 Giessen, Germany

11 3. Department of General Linguistics, Johannes-Gutenberg University Mainz, Mainz,  
12 Germany

13 4. Center for Mind, Brain and Behavior - CMBB, Hans-Meerwein-Straße 6, 35032 Marburg,  
14 Germany

15

16

17 \*Corresponding address: Yifei He, Department of Psychiatry and Psychotherapy, Philipps  
18 University Marburg, Rudolf-Bultmann-Str. 8, 35039, Marburg, Germany

19 \* Corresponding email: [yifei.he@staff.uni-marburg.de](mailto:yifei.he@staff.uni-marburg.de), ORCID: 0000-0002-2826-4230

20

21

22

23 **Abstract**

24

25 Schizophrenia is characterized by marked communication dysfunctions encompassing  
26 potential impairments in the processing of social-abstract and non-social-concrete  
27 information, especially in everyday situations where multiple modalities are present in the  
28 form of speech and gesture. To date, the neurobiological basis of these deficits remains  
29 elusive. In a functional magnetic resonance imaging (fMRI) study, 17 patients with  
30 schizophrenia or schizoaffective disorder, and 18 matched controls watched videos of an  
31 actor speaking, gesturing (unimodal), and both speaking and gesturing (bimodal) about  
32 social or non-social events in a naturalistic way. Participants were asked to judge whether  
33 each video contains person-related (social) or object-related (non-social) information. When  
34 processing social-abstract content, patients showed reduced activation in the medial  
35 prefrontal cortex (mPFC) only in the gesture but not in the speech condition. For non-social-  
36 concrete content, remarkably, reduced neural activation for patients in the left postcentral  
37 gyrus and the right insula was observed only in the speech condition. Moreover, in the  
38 bimodal conditions, patients displayed improved task performance and comparable  
39 activation to controls in both social and non-social content. To conclude, patients with  
40 schizophrenia displayed modality-specific aberrant neural processing of social and non-  
41 social information, which is not present for the bimodal conditions. This finding provides  
42 novel insights into dysfunctional multimodal communication in schizophrenia, and may have  
43 potential therapeutic implications.

44

45

46 **Key words:** social, multimodal processing, mPFC, gesture, speech, schizophrenia

47

48

49

## 50 **1. Introduction**

51 In everyday social communication, patients with schizophrenia encounter a diverse  
52 spectrum of inputs from multiple modalities (Holler & Levinson, 2019). These include non-  
53 linguistic stimuli from others' facial expressions (Gur et al., 2002; Vuilleumier et al., 2001),  
54 body movements, e.g., postures and gestures (He et al., 2020; Nagels et al., 2015b;  
55 Straube et al., 2013a), and linguistic stimuli in the form of auditory speech and written texts  
56 (Brown & Kuperberg, 2015). Importantly, the multimodal inputs comprise both social-  
57 abstract and non-social-concrete information, and patients' social functioning heavily  
58 depends on the processing of these stimuli, which serves as the basis to further mentalize  
59 social intentions and to perform appropriate social interaction (Amodio & Frith, 2006). To  
60 date, however, it remains elusive if the processing of these social/non-social information in  
61 schizophrenia is impaired in schizophrenia in a multimodal context.

62 Social cognition is known to be impaired in schizophrenia (Green et al., 2015).  
63 Regarding the perception of social stimuli, in particular, prior research on patients' social  
64 perception dysfunction has focused on emotional perception of faces and voices (Anticevic  
65 et al., 2012; Witteman et al., 2012), whereas limited studies have investigated the  
66 perception of social-abstract information delivered via linguistic and gesture stimuli. In  
67 healthy participants, a seminal fMRI (functional magnetic resonance imaging) study has  
68 identified distinct brain regions for processing socially and non-socially relevant linguistic  
69 information (Mitchell et al., 2002): When participants were asked to judge whether visual  
70 word pairs are person- or object-related, person-related social stimuli activated the medial  
71 prefrontal cortex (mPFC), a crucial region forming the mentalizing network (Amodio & Frith,

72 2006; Frith & Frith, 2006; Saxe & Powell, 2006; Van Overwalle, 2009). On the other hand,  
73 when processing linguistic stimuli about non-social-concrete content (e.g., words and  
74 sentences about objects), healthy participants activate regions including a left-lateralized  
75 network including the left the bilateral insula and the left parietal lobe (Binder et al., 2005;  
76 Chao et al., 1999).

77 Notably, in everyday life, both types of information are also commonly conveyed via  
78 non-linguistic channels such as manual gestures. For instance, even without speech,  
79 individuals can use a “be silent” emblematic gesture to deliver social information, and a  
80 “hammering” pantomime to describe a concrete object or action. Moreover, it is common to  
81 use both gesture and speech together: To ask someone else to stop, one can use a “stop”  
82 gesture (e.g., a front-facing, raised hand) together with its verbal counterpart. Emerging  
83 basic research has investigated if the processing of social-abstract and non-social-concrete  
84 information is modality-independent: for healthy populations, social-abstract information  
85 delivered by both auditory speech and manual gesture commonly activates the mPFC and  
86 the (IFG) and middle temporal gyri (Straube et al., 2010; Straube et al., 2013b)—regions  
87 that are typically activated for social cognition and abstract semantics (Binder et al., 2009;  
88 Van Overwalle, 2009). For processing non-social action and object information, literature  
89 also suggests that humans recruit modality-independent regions, such as the lateral  
90 occipitotemporal cortex (LOTc) and the pre/postcentral gyri (Barsalou, 2008; Pulvermüller  
91 et al., 2005; Wurm & Caramazza, 2019).

92 The multimodal characteristics of social/non-social information processing, as well as  
93 its supramodal neural basis, may have profound implications in schizophrenia research.

94 Schizophrenia is characterized by well-known deficits in the comprehension and production  
95 of speech (Bleuler, 1950; Kircher et al., 2002; Kuperberg et al., 2008), as well as  
96 impairments in the perception and production of gesture (Matthews et al., 2013; Millman et  
97 al., 2014; Mittal et al., 2006; Nagels et al., 2018; Straube et al., 2014; Straube et al., 2013a;  
98 Thakkar et al., 2014; Walther et al., 2015; Walther et al., 2013). Both language and gesture  
99 dysfunctions in schizophrenia are indicative of negative and positive symptoms of  
100 schizophrenia (Park et al., 2008; Walther et al., 2019), and are functionally highly relevant  
101 (Friedman et al., 2012; Walther et al., 2016). Yet, regarding the processing of social/non-  
102 social information, it remains unknown if both processes are impaired in schizophrenia  
103 irrespective of modality, or if the impairments are modality-specific. For the processing of  
104 social-abstract information, both linguistic (visual and auditory) and gesture (social  
105 emblems) have not been investigated in schizophrenia so far. However, studies employing  
106 non-semantic hand actions have shown that patients might be impaired for gesture  
107 perception in general (Thakkar et al., 2014; Walther et al., 2015). For the processing of  
108 concrete and non-social information, a previous study shows that patients are impaired in  
109 visually presented sentences (Kuperberg et al., 2008). Moreover, given potential  
110 dysfunctional processing of social or non-social information in schizophrenia, it remains  
111 unclear if these deficits could be potentially compensated by multimodal inputs containing  
112 both speech and gesture: Emerging literature suggests mutual facilitation between speech  
113 and gesture, at least for healthy populations (Cuevas et al., 2019; Drijvers et al., 2018; He  
114 et al., 2018b; Kraemer & Swerts, 2007; Wang & Chu, 2013).

115 To address these remaining research questions, we conducted the current study,

116 presenting to patients with schizophrenia and matched controls with videos of an actor  
117 communicating in a spontaneous and naturalistic manner. In these videos, the actor  
118 performs either social-abstract (person-related) or non-social (object-related) content in  
119 different modalities, where social and non-social information is perceivable in gesture- and  
120 speech-only modalities. Similar to approaches from previous research (Mitchell et al., 2002;  
121 Straube et al., 2013b), we directly compared social vs. non-social videos to identify neural  
122 perception of social and non-social information in both auditory-speech and visual-gesture  
123 modalities. Additionally, we showed to participants videos with bimodal inputs (actor both  
124 speaking and gesturing). Based on previous research, we hypothesized activation of the  
125 mPFC and a left frontal-temporal network (e.g., inferior frontal gyrus, middle temporal  
126 gyrus) for the processing of social-abstract information (Mitchell et al., 2002). For non-  
127 social-concrete information processing, we hypothesized left-lateralized regions including  
128 the lateral occipitotemporal cortex (LOTc), the superior temporal gyrus/sulcus (STG/STS),  
129 as well as pre/postcentral gyri forming the putative mirror neuron system (Järveläinen et al.,  
130 2004; Johnson-Frey, 2004; Johnson-Frey et al., 2003; Lingnau & Downing, 2015). We  
131 focused directly on group differences between a group of patients suffering from  
132 schizophrenia or schizoaffective disorder, and their age- and education-matched controls:  
133 for social content, as patients are well-known for their social cognition impairments, we  
134 expected patients to show reduced activation in the mPFC, irrespective of encoding  
135 modality (Frith, 2004); For non-social content, despite mixed findings from previous  
136 neuroimaging research on hand action observation on schizophrenia (Horan et al., 2014;  
137 Thakkar et al., 2014), following previous report on dysfunctional processing of non-social

138 linguistic stimuli in schizophrenia (Kuperberg et al., 2008), we hypothesized neural  
139 modulation of the object-related regions for patients with schizophrenia for both gesture and  
140 speech modalities. Additionally, based on prior basic research on mutual facilitation  
141 between gesture and speech (Cuevas et al., 2019; see Holler & Levinson, 2019 for review),  
142 we hypothesized that the bimodal input could compensate for potential unimodal  
143 processing deficits, leading to improved performance in the patient group.  
144  
145

## 146 **2. Methods**

### 147 *2.1 Participants*

148 We summarized participants' demographic and clinical characteristics in **Table 1**.  
149 Healthy controls were recruited matching age and education to patients (Sassenhagen &  
150 Alday, 2016). Seventeen patients were recruited at the Department of Psychiatry and  
151 Psychotherapy at the Philipps University of Marburg, and were diagnosed according to ICD-  
152 10 with schizophrenia (F20.0, n=13, and F20.3, n=1) or schizoaffective disorder (F25.0,  
153 n=2, and F25.3, n=1). Participants in both groups are native speakers of German, and have  
154 no knowledge of Russian language. All except one of the patients received antipsychotic  
155 treatment; six were additionally treated with antidepressive medication. Positive and  
156 negative symptoms were assessed with the Scale for the Assessment of Positive  
157 Symptoms (SAPS) (Andreasen, 1984), and the Scale for the Assessment of Negative  
158 Symptoms (SANS) (Andreasen, 1981). Eighteen age- and education-matched healthy  
159 participants with no history of any mental disorders were recruited from the same area.  
160 Exclusion criteria for both groups were brain injury and neurological or other medical  
161 diseases affected by brain physiology. In both groups, we conducted neuropsychological  
162 tests to assess working memory function, digit span, trail making (TMT), verbal IQ (MWT-B)  
163 (Lehrl, 1999), and metaphoric language processing (concretism, evaluated with the Proverb  
164 Interpretation Task) (Barth & Küfferle, 2001). These measures are reported in **Table 1**. We  
165 report, additionally, scores from the subscales of SAPS and SANS (Andreasen, 1981,  
166 1984), word fluency test, as well as gesture production and perception (BAG, Brief  
167 Assessment of Gesture (Nagels et al., 2015a)) in the supplement (**Table S1**). All



168 participants had normal or corrected-to-normal vision and hearing. Except for one control  
169 and one patient, all other participants are right-handed (Oldfield, 1971). All participants gave  
170 written informed consent prior to participation in the experiment and were compensated  
171 monetarily. The study was approved by the ethics committee of the School of Medicine,  
172 Philipps University Marburg.

173

**Table 1.** Demographic, medication, symptom, and neuropsychological measures.

|                     | Patients (n=17) | Controls (n=18) |
|---------------------|-----------------|-----------------|
| Age (years)         | 33.12 (12.35)   | 31.94 (10.21)   |
| Gender male/female  | 13/4            | 13/5            |
| Education (years)   | 11.82 (1.77)    | 12.72 (1.36)    |
| TMT A (seconds)     | 31.49 (10.73)   | 26.17 (9.89)    |
| TMT B (seconds)     | 68.56 (37.8)    | 52.93 (19.58)   |
| Digit Span forward  | 7.94 (1.75)     | 8.05 (2.43)     |
| Digit Span backward | 6.35 (1.93)     | 6.61 (2.50)     |
| Verbal IQ           | 28.8 (5.25)     | 28.5 (3.79)     |
| *Concretism         | 1.38 (0.45)     | 1.14 (0.19)     |
| SAPS (global)       | 15 (6.89)       |                 |
| SANS (global)       | 9 (6.02)        |                 |
| CPZ Equivalent      | 562.52 (372.63) |                 |

Values are presented as mean (SD). TMT: trail making test; CPZ: chlorpromazine. We reported only significant difference between controls and patients ( $p < 0.05$ , two-tailed t-test) with asterisks.

174

## 175 *2.2 Materials and procedure*

176 We employed a content judgement paradigm from previous studies from our research  
177 group to investigate modality-specific processing of social/non-social information (He et al.,  
178 2015; Straube et al., 2013b; Straube et al., 2018). Of note, the same fMRI dataset has been  
179 published with an unrelated research question (Wroblewski et al., 2020). We showed to  
180 participants five-second videos of an actor spontaneously communicating both social-  
181 abstract (S) and non-social-concrete (N) events in the following modalities: 1)

182 incomprehensible Russian sentences with gestures. This is considered as a gesture-only  
183 (G) condition because social feature is only available to participants in the gesture form. 2)  
184 comprehensible German sentences (S) without any gestures. Additionally, we also showed  
185 to participants 3) German sentences with accompanying gestures as a bimodal input  
186 condition (B). A filler condition is also included with videos of incomprehensible Russian  
187 sentences with meaningless gestures. An example of both a social (S) and non-social (N)  
188 bimodal videos is illustrated in **Figure 1A**. For a complete list of all videos, please refer to  
189 Appendix in He et al. (2015).

190

191

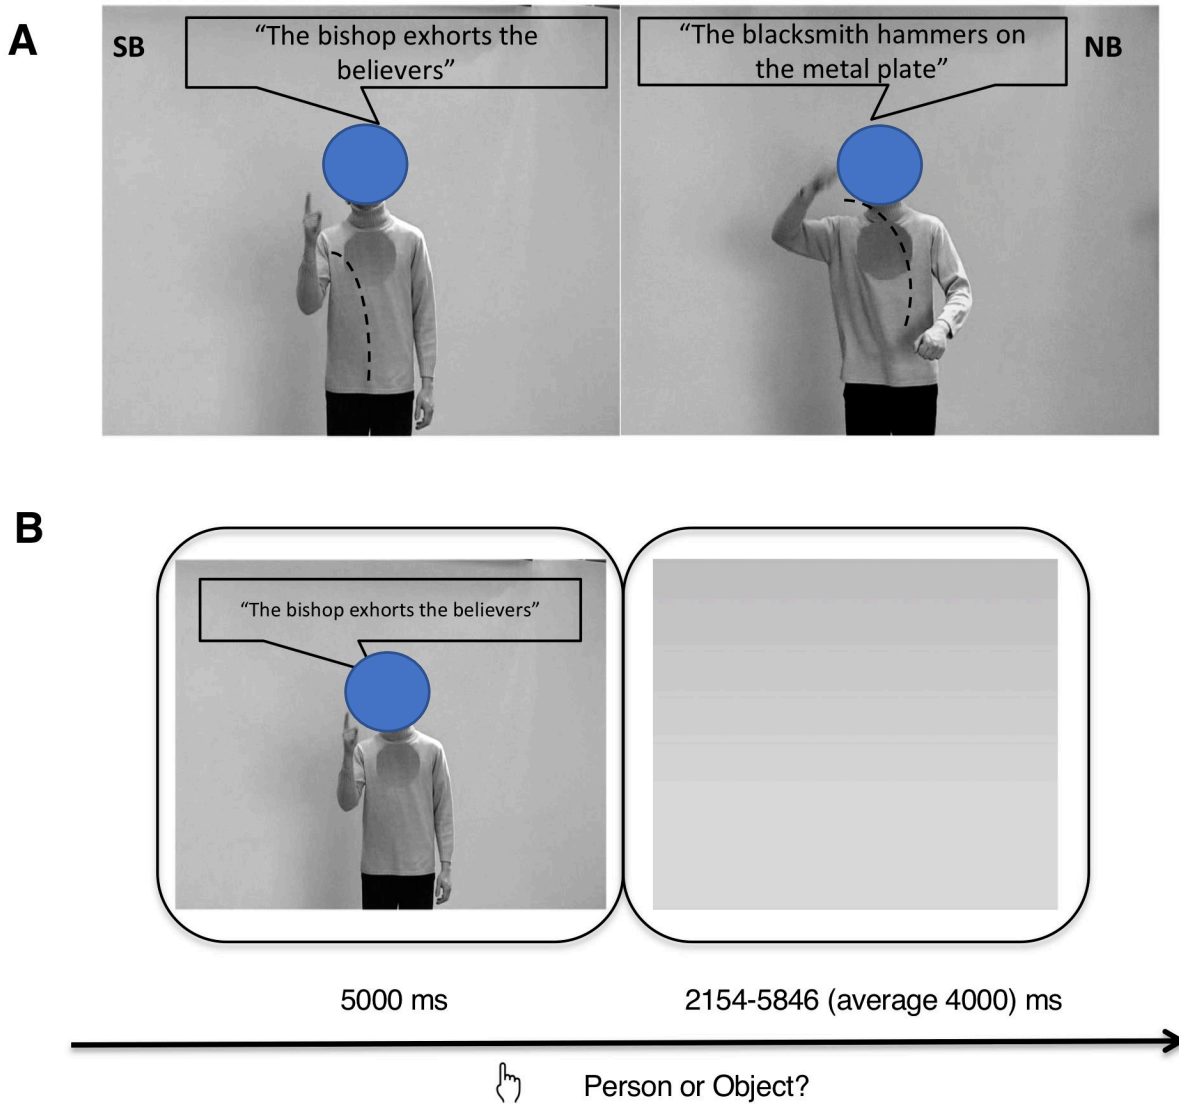

192

193 **Figure 1.** Panel A: Picture illustration for social-abstract (S) and non-social-concrete (N) videos in the bimodal  
194 condition (B). The same stimuli were also presented in two additional modalities: gestures with foreign  
195 Russian sentences (G) and German sentences without any gestures (S). For illustrative purposes, the spoken  
196 German sentences were translated into English, and all spoken sentences were written into speech bubbles.  
197 Panel B: Illustration of a sample trial. Participants performed a content judgment task for each video,  
198 indicating via button press whether a stimulus was either person- or object-related. Note that the face of the  
199 actor is only covered according to the privacy regulation from bioRxiv.

200

201

## 202 2.3 Procedure

203 Altogether, 312 experimental video slips (26 videos per condition × 6 conditions × 2  
204 sets) were included in the study. For each participant, an experimental session comprised  
205 182 videos from one set of videos (156 critical videos and 26 filler videos), and consisted of  
206 two 14-minute runs. Each run contained 91 trials with a matched number of items from  
207 each condition. The stimuli were presented in an event-related design in pseudo-  
208 randomized order. Within each trial, each video-clip was followed by a gray background  
209 with a variable duration of 2154-5846ms (jitter average: 4000ms), as illustrated in **Figure**  
210 **1B**. Participants performed a content judgement task for each video (Mitchell et al., 2002;  
211 Straube et al., 2013b), indicating via button press (with their left hand) whether a stimulus  
212 was either person- or object-related. Participants were instructed to respond to the task as  
213 soon as they had decided on an answer.

214

## 215 2.4 fMRI acquisition and preprocessing

216 All images were acquired using a 3T MRI scanner (Siemens MRT Trio series). The  
217 functional images were obtained using a T2\*-weighted echo-planar image sequence (TR =  
218 2s, TE = 30ms, flip angle = 90°, slice thickness = 4mm, interslice gap= 0.36mm, field of  
219 view= 230mm, matrix = 64 × 64, voxel size = 3.6 x 3.6 x 4.0mm, 30 axial slices orientated  
220 parallel to the AC-PC line, ascending order). Two runs of 425 volumes each were acquired  
221 during the experiment. Additionally, simultaneous EEG data from the participants were also  
222 collected for other analyses not relevant for the current study, and are therefore not further  
223 discussed here. MR images were preprocessed using the SPM12 software package

224 (Statistical Parametric Mapping, Wellcome Trust Center for Neuroimaging, London, UK)  
225 based on Matlab R2017a (version 9.2.0; MathWorks): after discarding the first five volumes  
226 to minimize T1-saturation effects, all images were spatially and temporally realigned, and  
227 normalized into the MNI space using the MNI template (resulting voxel size  $2 \times 2 \times 2$ mm),  
228 smoothed (8mm isotropic Gaussian filter), and high-pass filtered (cut-off period 128s).

229

### 230 *2.5 fMRI data analysis*

231 We performed statistical whole-brain analysis in a two-level, mixed-effects procedure.  
232 On the first level, single-participant BOLD responses were modeled by a design matrix  
233 comprising the onset time points of each event (critical word of each sentence as used in  
234 the previous event-related fMRI and EEG studies, e.g., (He et al., 2015; He et al., 2018a;  
235 He et al., 2018c; Straube et al., 2013b; Straube et al., 2018)), with a duration of 5s for all  
236 experimental conditions. The micro-time onset was set to the average time bin (8 of 16) to  
237 align the onset vector to the slice in the middle of the brain. For all conditions, the duration  
238 of speech and gesture was used as parameters of no interests on a single trial level. Six  
239 movement regressors (three rotations and three translations) were entered in the single  
240 participant's model to account for movement-induced effects on fMRI results. HRF was  
241 defined as the canonical HRF. Contrasts images against implicit baseline for all  
242 experimental conditions were used as summary measures and were included in the  
243 between-group analysis. We applied a flexible factorial analysis of variance using condition  
244 as main effect. We applied a Monte-Carlo simulation to determine the cluster extent  
245 threshold to correct for multiple comparisons, (Slotnick, 2017; Slotnick et al., 2003), which

246 has been used in comparable studies in our laboratory on social perception of multimodal  
247 stimuli (Nagels et al., 2015b). For all statistical comparisons, the whole-brain activation was  
248 simulated assuming a voxel type-I error activation of  $p < .05$ , this revealed a cluster extent of  
249 2268 contiguous resampled voxels as sufficient to correct for multiple comparisons at  
250  $p < .0167$  (Bonferroni-corrected for three independent tests for interaction within three  
251 independent modalities, with  $0.05/3$ ). We also reported in activation tables uncorrected  
252 cluster p-values and marked significance for cluster-level FWE correction. The reported  
253 voxel coordinates of activation peaks are located in MNI space. For the anatomical  
254 localization, functional data were referenced to the AAL toolbox (Tzourio-Mazoyer et al.,  
255 2002).

256 Firstly, we tested three-way interaction of group x modality x content. We then  
257 conducted, within each modality, interaction analyses to investigate group differences in the  
258 processing of social or non-social conditions, and masked the respective results based the  
259 contrast image from the first analysis, to reveal modality-specific group interaction. In  
260 addition, within each modality, for each group, we conducted pair-wise comparison between  
261 social and non-social conditions ( $S > N$  and  $N > S$ ), for illustrating modality- and group-  
262 specific brain activations for either social or non-social information processing. In the end,  
263 following our hypotheses on bimodal enhancement for patients, within patients, we tested  
264 the interaction between modalities on social vs. non-social content processing, so as to  
265 reveal how bimodal stimuli might compensate potential neural processing deficits for  
266 patients with schizophrenia. Results of this analysis is reported in **Supplement S2**.

267 Based on the literature showing a potential relationship between symptom severity

268 (especially negative symptoms) and social/non-social cognition (Mehta et al., 2014; Sergi et  
269 al., 2007), as well as gesture processing (Walther et al., 2019; Walther et al., 2013), for  
270 patients with schizophrenia, we conducted exploratory correlation analysis, probing for the  
271 potential relationship between clinical measures and brain activation in areas that are  
272 relevant to social/non-social information processing. To this end, spearman correlation  
273 analyses (uncorrected) were conducted between 1) parameter estimates from clusters  
274 showing significant group difference for either social or non-social conditions, 2) behavioral  
275 measures (reaction times and accuracy) for each experimental condition, and 3) scores  
276 from sum/general and subscales of SAPS and SANS.

277

### 278 **3. Results**

#### 279 *3.1 Behavioral results*

280 Healthy controls and patients with schizophrenia were instructed to indicate via button  
281 press whether the actor in the video described a person-related content or an object-related  
282 content. Correct responses (percentage correct) and their reaction times were analyzed  
283 each with mixed ANOVA [within factors: CONTENT (social vs. non-social) and MODALITY  
284 (bimodal vs. gesture vs. speech); between factor: GROUP (control vs. patient)]. Descriptive  
285 statistics for each experimental condition for both groups were provided in **Table 2**.

286 For accuracy, we observed three main effects despite no interaction with GROUP:  
287 Patients were significantly less accurate than healthy controls ( $F_{(1,33)} = 5.18, p = .03$ ). Non-  
288 social videos were judged more accurately than social videos ( $F_{(1,33)} = 19.75, p = .0001$ ).  
289 Additionally, accuracy between the three modalities was different ( $F_{(2,66)} = 14.53, p = .00001$ ).

290 Post-hoc pairwise t-test showed that the accuracy for the bimodal conditions were highest  
291 (vs. gesture,  $t = 5.81$ ,  $p = .000001$ ; vs. speech,  $t = 2.77$ ,  $p = .007$ ). The accuracy for the  
292 speech conditions was also higher than the gesture conditions ( $t = 2.14$ ,  $p = .035$ ).

293 For reaction time, there were also three main effects and no interaction with GROUP:  
294 patients were generally slower than healthy controls ( $F_{(1,33)} = 19.64$ ,  $p = .00001$ ). Reaction  
295 times for non-social content were faster than social content ( $F_{(1,33)} = 8.63$ ,  $p = .005$ ).  
296 Additionally, reaction times for the three modalities were different ( $F_{(2,66)} = 10.14$ ,  $p = .0001$ ).  
297 Post-hoc pairwise t-test showed that the reaction time for gesture modality was significantly  
298 slower than the other modalities ( $|t|_{\min} = 4.03$ ,  $p_{\max} = .0001$ ), and there was no significant  
299 difference between the bimodal and the speech modalities ( $t = 0.21$ ,  $p = .82$ ).

300 The results from the behavioral task showed that patients with schizophrenia were  
301 generally slower and less accurate in the content judgement task. Additionally, the  
302 responses for non-social videos were faster and more accurate. With regard to modality,  
303 responses in the bimodal conditions were the most accurate and the fastest.

304  
305



**Table 2: Accuracy and reaction times (RT) for the behavioral task**

| <b>Accuracy (%)</b>     |                         |           |                          |           |
|-------------------------|-------------------------|-----------|--------------------------|-----------|
| <b>Conditions</b>       | <b>Controls (n =18)</b> |           | <b>Patients (n = 17)</b> |           |
|                         | <b>Mean</b>             | <b>SD</b> | <b>Mean</b>              | <b>SD</b> |
| Social Bimodal (SB)     | 81.84                   | 10.78     | 71.79                    | 19.99     |
| Social Gesture (SG)     | 70.29                   | 16.36     | 63.34                    | 18.45     |
| Social Speech (SS)      | 79.91                   | 17.17     | 71.71                    | 20.57     |
| Non-social Bimodal (NB) | 93.95                   | 6.19      | 91.18                    | 12.96     |
| Non-social Gesture (NG) | 89.1                    | 10.49     | 82.8                     | 11.62     |
| Non-social Speech (NS)  | 88.46                   | 9.69      | 80.31                    | 22.95     |

  

| <b>Reaction times (ms)</b> |                         |           |                          |           |
|----------------------------|-------------------------|-----------|--------------------------|-----------|
| <b>Conditions</b>          | <b>Controls (n =18)</b> |           | <b>Patients (n = 17)</b> |           |
|                            | <b>Mean</b>             | <b>SD</b> | <b>Mean</b>              | <b>SD</b> |
| Social Bimodal (SB)        | 3270.26                 | 262.57    | 4196.31                  | 831.15    |
| Social Gesture (SG)        | 3154.67                 | 281.27    | 4042.41                  | 897.51    |
| Social Speech (SS)         | 3455.9                  | 279.19    | 4238.1                   | 785.66    |
| Non-social Bimodal (NB)    | 2982.74                 | 262.79    | 4092.35                  | 907.69    |
| Non-social Gesture (NG)    | 3185.07                 | 347.14    | 4122.33                  | 924.68    |
| Non-social Speech (NS)     | 3244.25                 | 325.07    | 4177.06                  | 921.39    |

SD, standard deviation; Reaction times were measured in reference to each video onset (full video length: 5s).

306

307

308 3.2 *fMRI results*

309 3.2.1 Social-abstract (S) > Non-social-concrete (N)

310 We report whole-brain fMRI results for S > N comparisons in **Figure 2** and **Table 2**. For the  
311 speech conditions (SS > NS), healthy controls activated an extensive fronto-temporal-  
312 parietal network including the bilateral inferior frontal gyrus (IFG) and the temporal lobe, the  
313 dorsolateral prefrontal cortex (dlPFC) and mPFC, and the left supramarginal gyrus; patients  
314 revealed similar regions for this comparison, and we observed no group difference for  
315 social > non-social speech. For the gesture conditions (SG > NG), controls activated the  
316 bilateral PFC and IFG; patients activated the bilateral prefrontal cortex. Group interaction  
317 (Control (SG > NG) > Patient (SG > NG)) suggests that patients showed reduced activation  
318 in the mPFC and the anterior cingulate cortex for the social gesture condition when  
319 compared to controls (**Figure 2B**). In the bimodal condition (SB > NB), both controls and  
320 patients activated regions similar to that of the speech condition. For patients, we  
321 additionally reported modality\*content interaction in the **Supplement S2**, which shows that  
322 patients' aberrant processing of social gestures is improved in the bimodal modality.

323

324

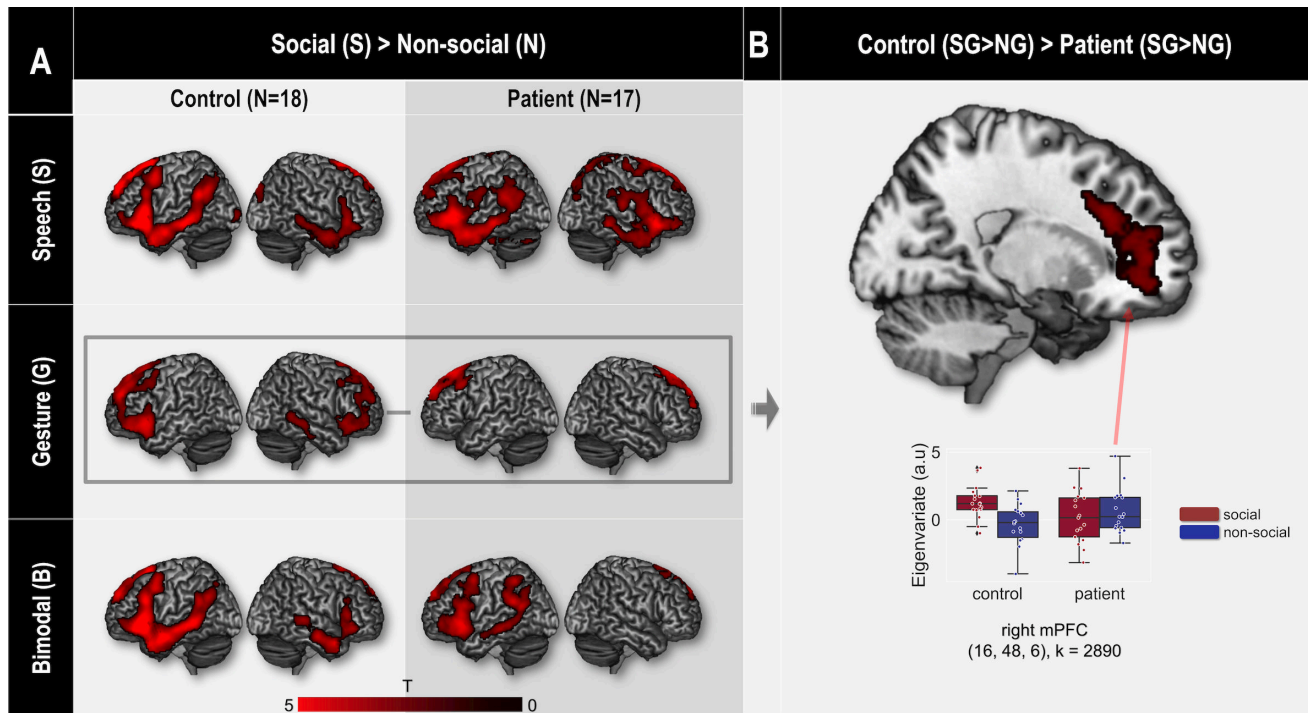

325

326 **Figure 2.** Activation maps for social-abstract > non-social-concrete videos (S > N). Panel A: S > N contrasts  
 327 within each modality (S: Speech, G: Gesture, B: bimodal) for controls and patients. Panel B: interaction  
 328 analysis (Control > Patient) in the gesture modality (SG > NG) together with box- and swarm-plots of  
 329 eigenvariates for selected clusters. All results are correct for multiple comparison with Monte-Carlo simulation  
 330 with  $k > 2268$  voxels.

331

**Table 2:** Peak MNI coordinates of within- and between-group significant brain comparisons for social > non-social conditions. Cluster-level uncorrected p-value is provided for each cluster, asterisk indicates significance ( $p < 0.05$ ) with cluster-level FWE correction.

| Contrasts                              | Anatomical Region (Peak)                 | Hem. | k     | Peak MNI coordinates |     |     | t    | p (unc.) |
|----------------------------------------|------------------------------------------|------|-------|----------------------|-----|-----|------|----------|
|                                        |                                          |      |       | x                    | y   | z   |      |          |
| <b>Control</b>                         |                                          |      |       |                      |     |     |      |          |
| SS>NS                                  | Inferior frontal gyrus pars orbitalis    | L    | 15202 | -48                  | 22  | -6  | 6.74 | <.001*   |
|                                        | Middle temporal gyrus                    | R    | 2816  | 48                   | -22 | -14 | 4.05 | .008     |
|                                        | Precuneus                                | L    | 4169  | -4                   | -48 | 42  | 3.18 | .002     |
| SG>NG                                  | Superior frontal gyrus                   | L    | 16869 | -22                  | 52  | 32  | 4.68 | <.001*   |
| SB>NB                                  | Inferior frontal gyrus pars orbitalis    | L    | 9637  | -46                  | 26  | -4  | 7.05 | <.001*   |
|                                        | Supplementary motor area                 | L    | 4916  | -8                   | 16  | 66  | 5.3  | .001*    |
|                                        | Middle temporal pole                     | R    | 3023  | 50                   | 10  | -28 | 4.64 | .006     |
| <b>Patient</b>                         |                                          |      |       |                      |     |     |      |          |
| SS>NS                                  | Inferior frontal gyrus pars orbitalis    | L    | 33204 | -50                  | 20  | -4  | 5.77 | <.001*   |
|                                        | Supplementary motor area                 | L    | 7862  | -2                   | 24  | 68  | 4.39 | <.001*   |
| SG>NG                                  | Superior frontal gyrus                   | L    | 2836  | -16                  | 32  | 62  | 3.86 | .008     |
| SB>NB                                  | Inferior frontal gyrus pars triangularis | L    | 4577  | -50                  | 24  | -2  | 4.83 | .001     |
|                                        | Supramarginal gyrus                      | L    | 3094  | -58                  | -46 | 26  | 4.33 | .006     |
|                                        | Medial superior frontal gyrus            | L    | 3155  | -4                   | 28  | 44  | 4.03 | .005     |
| <b>Interaction: Control&gt;Patient</b> |                                          |      |       |                      |     |     |      |          |
| SS>NS                                  | <b>N. S.</b>                             |      |       |                      |     |     |      |          |
| SG>NG                                  | Anterior cingulate cortex                | R    | 2890  | 16                   | 30  | 24  | 3.04 | .007     |
|                                        | Medial superior frontal gyrus            | R    |       | 16                   | 48  | 6   | 2.95 |          |
| SB>NB                                  | <b>N. S.</b>                             |      |       |                      |     |     |      |          |

333 3.2.2. Non-social-concrete (N) > Social-abstract (S)

334 We report whole-brain fMRI results for N > S comparisons in **Figure 3** and **Table 3**. For the  
335 speech conditions (NS > SS), healthy controls activated the left pre/postcentral gyrus,  
336 supramarginal gyrus, and the left insula, whereas patients did not reveal any significant  
337 activations for this comparison. The group interaction (Control (NS > SS) > Patient (NS >  
338 SS)) suggests that, when compared to controls, patients showed reduced activation in the  
339 left postcentral gyrus and the right insula for the processing of non-social content in the  
340 speech-only modality (**see Figure 3B**). For gesture conditions (NG > SG), controls showed  
341 increased activation for the non-social content in the bilateral posterior temporal gyrus,  
342 supramarginal gyrus, and occipital cortices, as well as the left pre/postcentral gyrus and the  
343 left insula. Patients also activated the bilateral posterior temporal gyrus and occipital lobe,  
344 as well as the left pre/postcentral gyrus. The group interaction revealed no significant  
345 clusters. For bimodal conditions (NB > SB), both controls and patients activated regions  
346 that are comparable to that of the gesture conditions. Additionally, for patients, bimodal  
347 input seems to enhance their aberrant processing of non-social speech, as reported in  
348 **Supplement S2**.

349

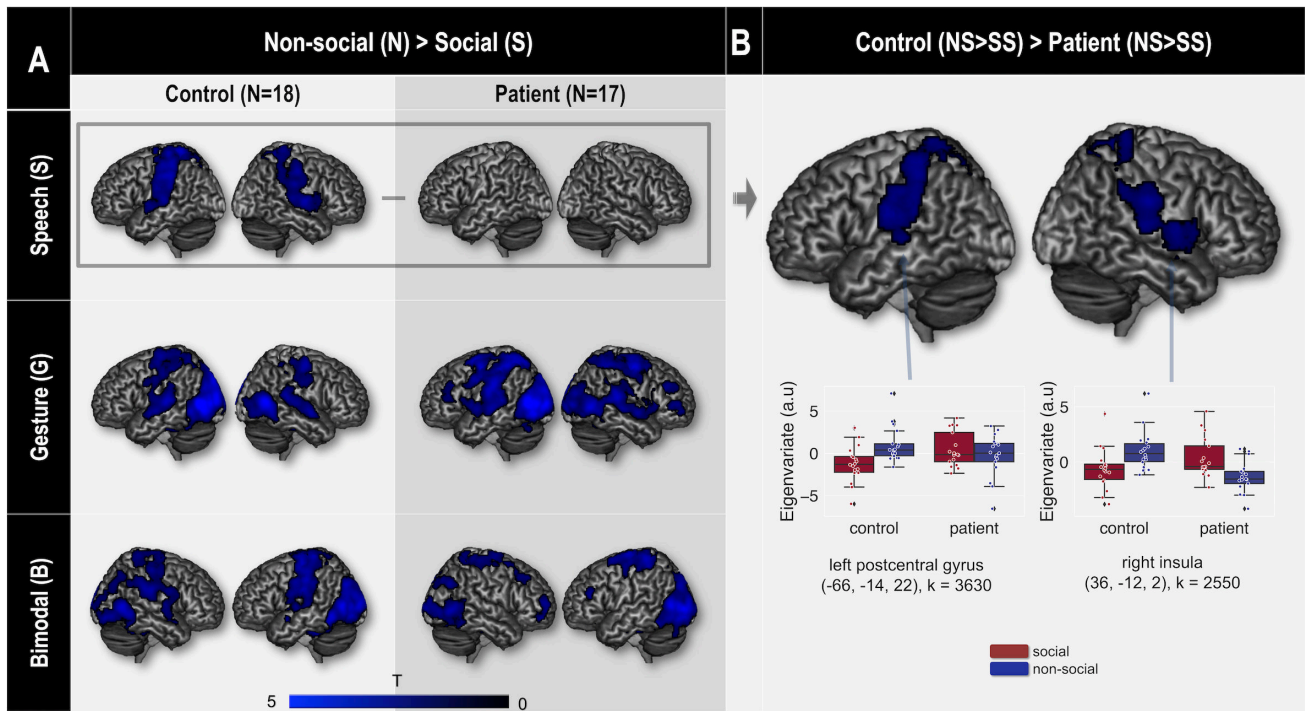

350  
 351 **Figure 3.** Activation maps for non-social-concrete > social-abstract videos (N > S). Panel A: N > S contrasts  
 352 within each modality (S: Speech, G: Gesture, B: Bimodal) for controls and patients. Panel B: interaction  
 353 analysis (Control > Patient) in the speech modality (NS > SS) together with box- and swarm-plots of  
 354 eigenvariates for selected clusters. All results are correct for multiple comparison with Monte-Carlo simulation  
 355 with  $k > 2268$  voxels.  
 356

**Table 3:** Peak MNI coordinates of within- and between-group significant brain comparisons for non-social > social conditions. Cluster-level uncorrected p value is provided for each cluster, asterisk indicates significance ( $p < 0.05$ ) with cluster-level FWE correction.

| Contrasts                              | Anatomical Region (Peak) | Hem. | k     | Peak MNI coordinates |     |    | t    | p (unc.) |
|----------------------------------------|--------------------------|------|-------|----------------------|-----|----|------|----------|
|                                        |                          |      |       | x                    | y   | z  |      |          |
| <b>Control</b>                         |                          |      |       |                      |     |    |      |          |
| NS>SS                                  | Middle cingulate cortex  | L    | 17667 | -48                  | -28 | 42 | 4.18 | <.001*   |
| NG>SG                                  | Middle Occipital gyrus   | L    | 18822 | -46                  | -72 | 4  | 6.48 | <.001*   |
|                                        | Middle temporal gyrus    | R    | 2620  | 50                   | -64 | 8  | 5.01 | .01      |
| NB>SB                                  | Middle temporal gyrus    | L    | 15424 | -50                  | -72 | 6  | 4.55 | <.001*   |
|                                        | Supplementary motor area | R    | 8910  | 6                    | -12 | 56 | 3.7  | <.001*   |
| <b>Patient</b>                         |                          |      |       |                      |     |    |      |          |
| NS>SS                                  | <b>N. S.</b>             |      |       |                      |     |    |      |          |
| NG>SG                                  | Middle temporal gyrus    | L    | 49718 | -48                  | -70 | 6  | 6.9  | <.001*   |
| NB>SB                                  | Middle occipital gyrus   | L    | 22719 | -30                  | -88 | 2  | 4.86 | <.001*   |
|                                        | Olfactory cortex         | L    | 3347  | -8                   | 26  | -4 | 4.2  | .004     |
| <b>Interaction: Control&gt;Patient</b> |                          |      |       |                      |     |    |      |          |
| NS>SS                                  | Insula                   | R    | 2550  | 36                   | -12 | 2  | 3.05 | .011     |
|                                        | Postcentral gyrus        | L    | 3630  | -66                  | -14 | 22 | 2.92 | .003     |
| NG>SG                                  | <b>N. S.</b>             |      |       |                      |     |    |      |          |
| NB>SB                                  | <b>N. S.</b>             |      |       |                      |     |    |      |          |

358 3.3 Exploratory correlation analyses

359 In patients, for the NS condition, we found that the accuracy for the NS condition correlate  
360 negatively with the SANS composite scores of the patients ( $r = -0.52$ ,  $p = 0.03$ , power =  
361 0.63; **Figure 4A**). Additionally, SANS 1 (flat affect) and SANS 2 (alogia) scores correlate  
362 negatively with the accuracy for the NS condition (SANS 1:  $r = -0.62$ ,  $p = 0.008$ , power =  
363 0.79, **Figure 4B**; SANS 2:  $r = -0.63$ ,  $p = 0.006$ , power = 0.82, **Figure 4C**).

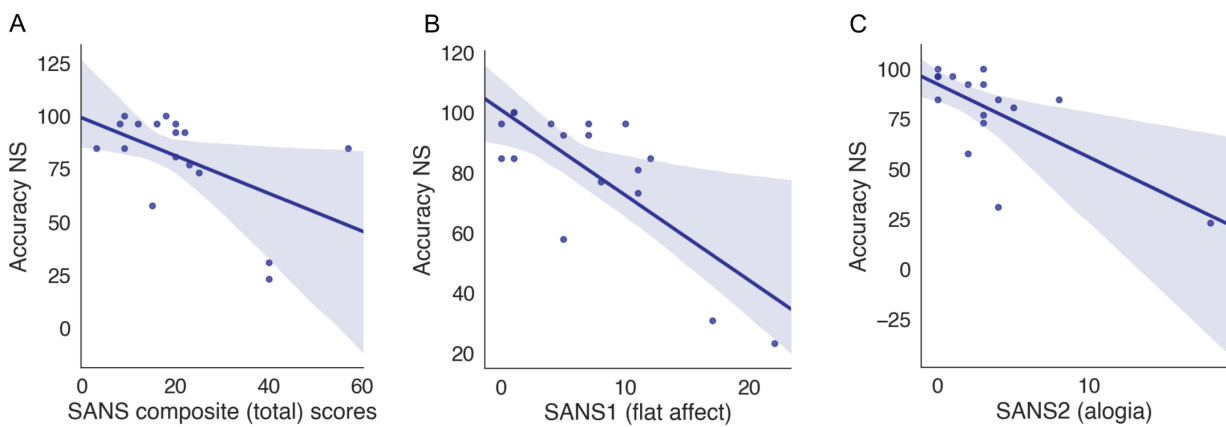

364

365 **Figure 4.** Significant negative correlations between patients' accuracy for the NS condition and A) patients'  
366 SANS composite scores, B) their SANS 1 (flat affect) scores, and C) their SANS 2 (alogia) scores.

367



## 368 **4. Discussion**

369 With an fMRI study on the perception of social-abstract and non-social-concrete stimuli in  
370 auditory-speech, visuo-gestural, and bimodal modalities, we observed modality-specific  
371 neural modulation in schizophrenia: In comparison to controls, reduced neural activity in  
372 patients was observed only for social gesture and non-social speech. Moreover, in the  
373 bimodal condition, neural activation for both social and non-social contents was comparable  
374 in patients and controls.

375

### 376 *4.1 Social information processing in schizophrenia*

377 In the current study, patients showed dissociable neural modulation during the  
378 processing of social content in speech and gesture modalities. In the speech modality, both  
379 controls and patients activated a left-lateralized set of brain regions, including the dIPFC,  
380 mPFC, the IFG, the temporal lobe, and the angular/supramarginal gyrus, without any group  
381 difference. This finding replicates results from our previous study showing supramodal  
382 social-abstract processing of healthy individuals (Straube et al., 2013b), and is consistent  
383 with earlier studies in basic research on the role of the mPFC in both perceiving social-  
384 related stimuli and mentalizing social intentions (Mitchell et al., 2005; Mitchell et al., 2002;  
385 Van Overwalle, 2009). The observed left IFG and temporal lobe activation is also in line  
386 with the literature on the neural substrates of abstract vs. concrete semantics (Binder et al.,  
387 2009; Binder et al., 2005), as the videos in the social-abstract condition, irrespective of  
388 modality, are more abstract than the non-social, object-related condition. The fact that we  
389 did not find any group differences in social-abstract speech processing suggests that

390 patients with schizophrenia exhibit intact neural processing of social content presented in  
391 this modality. This finding complies with a previous language study in schizophrenia, in  
392 which patients also activated a comparable left fronto-temporal network to controls when  
393 they processed abstract vs. concrete visual sentences (Kuperberg et al., 2008). Together,  
394 although schizophrenia is well-known for its social cognition deficits (Green et al., 2015), as  
395 well as impairments in the perception of affective face or pitch (Edwards et al., 2001;  
396 Leitman et al., 2005; Morris et al., 2009), patient's processing of social speech may remain  
397 intact. In the gesture modality, however, although patients activated the mPFC for the social  
398 vs. non-social stimuli, this activation was reduced when compared to controls. Notably,  
399 such modality-specific neural modulation is, for the first time, reported for social information  
400 processing in schizophrenia. Notably, in addition to the mPFC modulation, in schizophrenia,  
401 we did not observe the activation for social gestures in the left IFG. The left IFG has been  
402 linked to motor planning of gesture (Walther et al., 2013); and, together with the DLPFC, left  
403 IFG activation has been shown to be modulated in schizophrenia for social gesture  
404 planning (Stegmayer et al., 2018). Thus, our results, from a perception perspective,  
405 corroborates these extant studies, showing that both the PFC and the left IFG functional  
406 modulation may give rise to gesture-specific social perception deficits.

407

#### 408 *4.2 Non-social information processing in schizophrenia*

409 For the processing of non-social (object-related) information, again, the neural  
410 modulation in patients showed an apparent dissociation. In the gesture modality, both  
411 controls and patients activated the bilateral occipital-parietal cortices, STG, LOTC, insula,

412 and the pre/postcentral gyrus. In the speech modality, although these regions were similarly  
413 activated in controls, their brain activation was significantly reduced for patients. The group  
414 comparison suggests reduced activation in schizophrenia patients in the left insula and the  
415 left postcentral gyrus for non-social speech. Of note, the observed regions for non-social  
416 and object-related information processing overlap with regions considered as part of the  
417 putative mirror neuron network, which is not only important for action observation and  
418 imitation, but also for the understanding of object- and motor-related features in verbal form  
419 (Buccino et al., 2001; Di Pellegrino et al., 1992; Iacoboni et al., 1999; Rizzolatti &  
420 Craighero, 2004). This process would require mental simulation of sensorimotor experience  
421 (Barsalou, 2008; Pulvermüller, 2005; Pulvermüller et al., 2005). Additionally, the LOTC is  
422 also crucially involved in the perception of biological motion, object, as well as tool-use (Bi  
423 et al., 2016; Higuchi et al., 2007; Lingnau & Downing, 2015). Moreover, these regions are  
424 also reported to support the processing of concrete linguistic information (Binder et al.,  
425 2009; Binder et al., 2005). Our data from the control group suggest that these regions  
426 support the processing of non-social-concrete features, irrespective of encoding modality.  
427 This finding is in line with the embodiment view of action and language processing  
428 (Barsalou, 2008; De Stefani & De Marco, 2019). With regard to the patients, we observed  
429 normal neural processing of non-social content in the gesture modality, supporting a  
430 previous study (Horan et al., 2014), which reported intact mirror neuron activity in  
431 schizophrenia (but see (Thakkar et al., 2014)). However, as we also observed reduced  
432 bilateral postcentral gyrus and right insula activity for patients for non-social speech, in turn,  
433 this would imply that motor simulation, as required for processing object-related features

434 from auditory speech, might still be impaired in schizophrenia (Kuperberg et al., 2008;  
435 Thakkar et al., 2014). This impairment concurs with the reported deficits of schizophrenia in  
436 action imitation (Matthews et al., 2013; Mehta et al., 2014; Park et al., 2008; Thakkar et al.,  
437 2014; Walther et al., 2015; Walther et al., 2013), where certain degrees of motor simulation  
438 is required. However, adding to prior research on schizophrenia's motor impairments, our  
439 results provide a more nuanced version: Motor-related semantics as delivered by  
440 pantomime does not necessarily lead to reduced neural activation in schizophrenia; rather,  
441 modulated neural activity is only observed for speech contents simulating these concrete  
442 motor-actions. This might be suggesting that patients with schizophrenia are impaired in a  
443 mirror-mechanism simulating concrete-motor events with speech.

444 In the NS condition, we also observed negative correlation between patients' SANS  
445 composite and subscores and their task accuracy. This evidence converges with previous  
446 research, corroborating the potential role of the mirror neuron system during embodiment of  
447 non-social information (e.g., action imitation and observation), as well as its relation to the  
448 development and persistence of negative symptoms (Buccino & Amore, 2008; Mehta et al.,  
449 2014). Our correlational finding, although being exploratory (see 4.4), links the mirror  
450 neuron system to the reported studies showing correlation between compromised gesture  
451 performance and more severe negative symptoms (Park et al., 2008; Walther et al., 2019),  
452 tentatively suggests that the theoretical link between gesture and negative symptom may  
453 partially derive from motor-simulation. Notably, in the current study, for social processing,  
454 we did not observe any correlations between brain activations / behavior and symptom  
455 measures, especially positive symptoms such as hallucinations, and positive formal thought

456 disorders, as in Straube et al. (2014). Clearly, the exact relationship between social/non-  
457 social information processing and major symptoms of schizophrenia needs to be addressed  
458 by further research with larger samples.

459

#### 460 *4.3 Enhancing modality-specific information processing deficits with bimodal input*

461 The novelty of our findings lies in the dissociable modality-specificity concerning  
462 dysfunctional neural processing of social and non-social features. Social-abstract and non-  
463 social-concrete features are functionally and neurally dissociable at the representational  
464 level (Binder et al., 2009; Mitchell et al., 2005; Mitchell et al., 2002). Besides, they might be  
465 differentially processed through either linguistic (speech) or non-linguistic (gesture)  
466 channels. It has been proposed that social-abstract concepts may be *preferentially*  
467 represented in speech, and that non-social concrete concepts are *preferentially* delivered in  
468 hand action and gesture (Paivio, 2010; Perlovsky & Ilin, 2013). Despite this theoretical  
469 proposal, however, during comprehension, healthy participants are able to process both  
470 types of information in a supramodal manner (e.g., semantic processing with unitary core  
471 systems, irrespective of encoding modality, as in (Pulvermüller et al., 2005; Straube et al.,  
472 2013b)). For patients with schizophrenia, as they exhibit similar neural activations when  
473 processing social speech and non-social gestures to controls, this might be an indication  
474 that they are at least intact in processing these contents through a *preferred* modality at  
475 representational level. But, they might show activation reduction in relevant regions when  
476 these features are conveyed in a *non-preferred* modality, as the processing of these  
477 features would require some form of mental simulation: In the case non-social information,

478 patients are impaired in the simulation of motor-related experience from action to language  
479 (Pulvermüller et al., 2005); In contrast, when patients are presented with social information,  
480 they might be impaired when simulating social features encoded by hand gestures (but not  
481 with speech), as shown in their reduced mPFC activation. This observed modality-specific  
482 processing deficit might also suggest that patients, unlike controls, are not capable of  
483 processing social/non-social information in a supramodal manner like healthy participants,  
484 as reported in previous studies (Straube et al., 2012; Straube et al., 2013b). More  
485 importantly, extending previous studies on aberrant processing of social/non-social content  
486 in schizophrenia, our results indicate that this neural deficit is not universally present for  
487 either a specific modality or content, but rather appears only in specific combinations of  
488 these two factors.

489       Despite reduced neural processing of both social and non-social content in gesture and  
490 speech modalities, patients displayed intact neural processing of these features, as well as  
491 improved task accuracy in the bimodal conditions. This enhancement effect concurs with a  
492 line of proposals (Holler & Levinson, 2019), who argue for a bi-directional facilitative relation  
493 between speech and gesture (for empirical evidence, see (Cuevas et al., 2019; Drijvers et  
494 al., 2018; He et al., 2018b; Kraemer & Swerts, 2007; Wang & Chu, 2013)). More  
495 importantly, our finding extends previous basic research, suggesting the translational  
496 implication of this mechanism. In schizophrenia research, the past decade has witnessed  
497 substantial progress in the development of social cognitive training in schizophrenia (Kurtz  
498 et al., 2016; Kurtz & Richardson, 2011), with recent innovation regarding the incorporation  
499 of social stimuli from a broader range of modalities (Nahum et al., 2014). Our findings

500 extend these approaches, proposing potential therapeutic implications of deploying  
501 naturalistic and multimodal stimuli during social cognitive training (Riedl et al., 2020), as  
502 they might be able to normalize processing of both social and non-social information, at  
503 least at a neural level. Future research is expected to further explore whether the neural  
504 enhancements can be linked to functional outcome after social cognitive training in a  
505 multimodal setting.

506

#### 507 *4.4 Limitations*

508 Despite new insights, our study is limited in several aspects. Firstly, the sample size of this  
509 study (n = 17 and 18 for each group) falls within the required minimum of this type of  
510 studies (Friston, 2013). Hence, due to sample size, the patient group was limited to  
511 medicated chronic patients, and we were thus unable to test if the neural pattern is  
512 comparable to first-episode schizophrenia (Kindler et al., 2019), and were unable to  
513 attribute the findings to schizophrenia without separating out the effects of medication.  
514 Secondly, due to the limited sample size and the exploratory nature, the findings resulted  
515 from the correlation analyses needs to be treated with caution. Lastly, we did not observe  
516 any reliable relationship between BOLD signal and behavioral results: More careful, and  
517 neurobiologically plausible behavioral tasks on the social/non-social information processing  
518 are necessary for future experiments, so that their processing deficits in schizophrenia can  
519 be better examined by clinical neuroscientists and practitioners.

520

#### 521 *4.5 Conclusion*

522 Here, in an fMRI study, we for the first time showed modality-specific neural modulation in  
523 schizophrenia when patients process social-abstract and non-social-concrete content in  
524 speech and gesture. Moreover, these deficits could be compensated when both speech and  
525 gesture were presented together. Our findings provide novel insights on dysfunctional  
526 multimodal communication in schizophrenia, and suggest potential therapeutic implications  
527 of employing multimodal social cognitive intervention in schizophrenia.

528



529 **5. Acknowledgements**

530 This research project is supported by a grant from the 'Von-Behring-Röntgen-Stiftung'  
531 (project no. 59-0002 and 64-0001) and by the 'Deutsche Forschungsgemeinschaft' (project  
532 no. DFG: STR1146/11-2 & KI588/6-2 and CRC/TRR 135/2 project A3). The study was also  
533 supported by the Core Facility Brain Imaging, Faculty of Medicine, University of Marburg,  
534 Rudolf-Bultmann-Str. 9, 35039, Marburg, Germany. The manuscript has been published as  
535 a preprint on bioRxiv.

536

537 **6. Conflict of interests**

538 All authors declare no financial conflict of interests.

539

540

541

542

543

544

545

## 546 References

547

- 548 Amodio, D. M., & Frith, C. D. (2006). Meeting of minds: the medial frontal cortex and social cognition. *Nature*  
549 *Reviews Neuroscience*, 7(4), 268.
- 550 Andreasen, N. C. (1981). Scale for the Assessment of Negative Symptoms (SANS).
- 551 Andreasen, N. C. (1984). *Scale for the Assessment of Positive Symptoms:(SAPS)*: University of Iowa.
- 552 Anticevic, A., Van Snellenberg, J. X., Cohen, R. E., Repovs, G., Dowd, E. C., & Barch, D. M. (2012).  
553 Amygdala recruitment in schizophrenia in response to aversive emotional material: a meta-analysis of  
554 neuroimaging studies. *Schizophrenia Bulletin*, 38(3), 608-621.
- 555 Barsalou, L. W. (2008). Grounded cognition. *Annu. Rev. Psychol.*, 59, 617-645.
- 556 Barth, A., & Küfferle, B. (2001). Development of a proverb test for assessment of concrete thinking problems  
557 in schizophrenic patients. *Der Nervenarzt*, 72(11), 853-858.
- 558 Bi, Y., Wang, X., & Caramazza, A. (2016). Object Domain and Modality in the Ventral Visual Pathway. *Trends*  
559 *in Cognitive Sciences*, 20(4), 282-290. doi:10.1016/j.tics.2016.02.002
- 560 Binder, J. R., Desai, R. H., Graves, W. W., & Conant, L. L. (2009). Where is the semantic system? A critical  
561 review and meta-analysis of 120 functional neuroimaging studies. *Cerebral Cortex*, 19(12), 2767-  
562 2796.
- 563 Binder, J. R., Westbury, C. F., McKiernan, K. A., Possing, E. T., & Medler, D. A. (2005). Distinct Brain Systems  
564 for Processing Concrete and Abstract Concepts. *Journal of Cognitive Neuroscience*, 17(6), 905-917.  
565 doi:10.1162/0898929054021102
- 566 Bleuler, E. (1950). Dementia praecox or the group of schizophrenias.
- 567 Brown, M., & Kuperberg, G. R. (2015). A Hierarchical Generative Framework of Language Processing: Linking  
568 Language Perception, Interpretation, and Production Abnormalities in Schizophrenia. *Frontiers in*  
569 *Human Neuroscience*, 9(e29315), 611. doi:10.3389/fnhum.2015.00643
- 570 Buccino, G., & Amore, M. (2008). Mirror neurons and the understanding of behavioural symptoms in  
571 psychiatric disorders. *Current opinion in psychiatry*, 21(3), 281-285.  
572 doi:10.1097/YCO.0b013e3282fbc32
- 573 Buccino, G., Binkofski, F., Fink, G. R., Fadiga, L., Fogassi, L., Gallese, V., . . . Freund, H. J. (2001). Action  
574 observation activates premotor and parietal areas in a somatotopic manner: an fMRI study. *European*  
575 *Journal of Neuroscience*, 13(2), 400-404.
- 576 Chao, L. L., Haxby, J. V., & Martin, A. (1999). Attribute-based neural substrates in temporal cortex for  
577 perceiving and knowing about objects. *Nature Neuroscience*, 2(10), 913-919.
- 578 Cuevas, P., Steines, M., He, Y., Nagels, A., Culham, J., & Straube, B. (2019). The facilitative effect of gestures  
579 on the neural processing of semantic complexity in a continuous narrative. *Neuroimage*, 195, 38-47.
- 580 De Stefani, E., & De Marco, D. (2019). Language, Gesture, and Emotional Communication: An Embodied  
581 View of Social Interaction. *Frontiers in Psychology*, 10.
- 582 Di Pellegrino, G., Fadiga, L., Fogassi, L., Gallese, V., & Rizzolatti, G. (1992). Understanding motor events: a  
583 neurophysiological study. *Experimental Brain Research*, 91(1), 176-180.
- 584 Drijvers, L., Özyürek, A., & Jensen, O. (2018). Hearing and seeing meaning in noise: Alpha, beta, and gamma  
585 oscillations predict gestural enhancement of degraded speech comprehension. *Human Brain*  
586 *Mapping*, 59(5), 617-613. doi:10.1002/hbm.23987
- 587 Edwards, J., Pattison, P. E., Jackson, H. J., & Wales, R. J. (2001). Facial affect and affective prosody  
588 recognition in first-episode schizophrenia. *Schizophrenia Research*, 48(2-3), 235-253.

- 589 Friedman, T., Sehatpour, P., Dias, E., Perrin, M., & Javitt, D. C. (2012). Differential relationships of mismatch  
590 negativity and visual p1 deficits to premorbid characteristics and functional outcome in schizophrenia.  
591 *Biological Psychiatry*, 71(6), 521-529.
- 592 Friston, K. (2013). Sample size and the fallacies of classical inference. *Neuroimage*, 81, 503-504.
- 593 Frith, C. D. (2004). Schizophrenia and theory of mind. *Psychological Medicine*, 34(3), 385-389.
- 594 Frith, C. D., & Frith, U. (2006). The neural basis of mentalizing. *Neuron*, 50(4), 531-534.
- 595 Green, M. F., Horan, W. P., & Lee, J. (2015). Social cognition in schizophrenia. *Nature Reviews Neuroscience*,  
596 16(10), 620.
- 597 Gur, R. E., McGrath, C., Chan, R. M., Schroeder, L., Turner, T., Turetsky, B. I., . . . Ragland, J. D. (2002). An  
598 fMRI study of facial emotion processing in patients with schizophrenia. *American Journal of*  
599 *Psychiatry*, 159(12), 1992-1999.
- 600 He, Y., Gebhardt, H., Steines, M., Sammer, G., Kircher, T., Nagels, A., & Straube, B. (2015). The EEG and  
601 fMRI signatures of neural integration: An investigation of meaningful gestures and corresponding  
602 speech. *Neuropsychologia*, 72, 27-42. doi:10.1016/j.neuropsychologia.2015.04.018
- 603 He, Y., Luell, S., Muralikrishnan, R., Straube, B., & Nagels, A. (2020). Gesture's body orientation modulates  
604 the N400 for visual sentences primed by gestures. *Human Brain Mapping*.
- 605 He, Y., Nagels, A., Schlesewsky, M., & Straube, B. (2018a). The Role of Gamma Oscillations During  
606 Integration of Metaphoric Gestures and Abstract Speech. *Front Psychol*, 9, 1348.  
607 doi:10.3389/fpsyg.2018.01348
- 608 He, Y., Steines, M., Sammer, G., Nagels, A., Kircher, T., & Straube, B. (2018b). Action-Related Speech  
609 Modulates Beta Oscillations During Observation of Tool-Use Gestures. *Brain Topogr*, 31(5), 838-847.  
610 doi:10.1007/s10548-018-0641-z
- 611 He, Y., Steines, M., Sommer, J., Gebhardt, H., Nagels, A., Sammer, G., . . . Straube, B. (2018c). Spatial-  
612 temporal dynamics of gesture-speech integration: a simultaneous EEG-fMRI study. *Brain Struct*  
613 *Funct*, 223(7), 3073-3089. doi:10.1007/s00429-018-1674-5
- 614 Higuchi, S., Imamizu, H., & Kawato, M. (2007). Cerebellar Activity Evoked By Common Tool-Use Execution  
615 And Imagery Tasks: An Fmri Study. *Cortex*, 43(3), 350-358. doi:10.1016/S0010-9452(08)70460-X
- 616 Holler, J., & Levinson, S. C. (2019). Multimodal Language Processing in Human Communication. *Trends in*  
617 *Cognitive Sciences*.
- 618 Horan, W. P., Iacoboni, M., Cross, K. A., Korb, A., Lee, J., Nori, P., . . . Green, M. F. (2014). Self-reported  
619 empathy and neural activity during action imitation and observation in schizophrenia. *NeuroImage:*  
620 *Clinical*, 5, 100-108.
- 621 Iacoboni, M., Woods, R. P., Brass, M., Bekkering, H., Mazziotta, J. C., & Rizzolatti, G. (1999). Cortical  
622 mechanisms of human imitation. *Science*, 286(5449), 2526-2528.
- 623 Järveläinen, J., Schuermann, M., & Hari, R. (2004). Activation of the human primary motor cortex during  
624 observation of tool use. *Neuroimage*, 23(1), 187-192.
- 625 Johnson-Frey, S. H. (2004). The neural bases of complex tool use in humans. *Trends in Cognitive Sciences*,  
626 8(2), 71-78.
- 627 Johnson-Frey, S. H., Maloof, F. R., Newman-Norlund, R., Farrer, C., Inati, S., & Grafton, S. T. (2003). Actions  
628 or hand-object interactions? Human inferior frontal cortex and action observation. *Neuron*, 39(6),  
629 1053-1058.
- 630 Kindler, J., Michel, C., Schultze-Lutter, F., Felber, G., Hauf, M., Schimmelmann, B. G., . . . Walther, S. (2019).  
631 Functional and structural correlates of abnormal involuntary movements in psychosis risk and first  
632 episode psychosis. *Schizophrenia Research*, 212, 196-203.

- 633 Kircher, T., Liddle, P., Brammer, M., Williams, S., Murray, R., & McGuire, P. (2002). Reversed lateralization of  
634 temporal activation during speech production in thought disordered patients with schizophrenia.  
635 *Psychological Medicine*, 32(3), 439.
- 636 Krahmer, E., & Swerts, M. (2007). The effects of visual beats on prosodic prominence: Acoustic analyses,  
637 auditory perception and visual perception. *Journal of Memory and Language*, 57(3), 396-414.  
638 doi:10.1016/j.jml.2007.06.005
- 639 Kuperberg, G. R., West, W. C., Lakshmanan, B. M., & Goff, D. (2008). Functional Magnetic Resonance  
640 Imaging Reveals Neuroanatomical Dissociations During Semantic Integration in Schizophrenia.  
641 *Biological Psychiatry*, 64(5), 407-418. doi:10.1016/j.biopsych.2008.03.018
- 642 Kurtz, M. M., Gagen, E., Rocha, N. B., Machado, S., & Penn, D. L. (2016). Comprehensive treatments for  
643 social cognitive deficits in schizophrenia: A critical review and effect-size analysis of controlled  
644 studies. *Clinical psychology review*, 43, 80-89.
- 645 Kurtz, M. M., & Richardson, C. L. (2011). Social cognitive training for schizophrenia: a meta-analytic  
646 investigation of controlled research. *Schizophrenia Bulletin*, 38(5), 1092-1104.
- 647 Lehrl, S. (1999). *Mehrfachwahl-Wortschatz-Intelligenztest: MWT-B*: Spitta.
- 648 Leitman, D. I., Foxe, J. J., Butler, P. D., Saperstein, A., Revheim, N., & Javitt, D. C. (2005). Sensory  
649 contributions to impaired prosodic processing in schizophrenia. *Biological Psychiatry*, 58(1), 56-61.
- 650 Lingnau, A., & Downing, P. E. (2015). The lateral occipitotemporal cortex in action. *Trends in Cognitive*  
651 *Sciences*, 19(5), 268-277. doi:10.1016/j.tics.2015.03.006
- 652 Matthews, N., Gold, B. J., Sekuler, R., & Park, S. (2013). Gesture imitation in schizophrenia. *Schizophrenia*  
653 *Bulletin*, 39(1), 94-101.
- 654 Mehta, U. M., Thirhalli, J., Aneelraj, D., Jadhav, P., Gangadhar, B. N., & Keshavan, M. S. (2014). Mirror  
655 neuron dysfunction in schizophrenia and its functional implications: a systematic review.  
656 *Schizophrenia Research*, 160(1-3), 9-19.
- 657 Millman, Z. B., Goss, J., Schiffman, J., Mejias, J., Gupta, T., & Mittal, V. A. (2014). Mismatch and lexical  
658 retrieval gestures are associated with visual information processing, verbal production, and  
659 symptomatology in youth at high risk for psychosis. *Schizophrenia Research*, 158(1-3), 64-68.
- 660 Mitchell, J. P., Banaji, M. R., & Macrae, C. N. (2005). General and specific contributions of the medial  
661 prefrontal cortex to knowledge about mental states. *Neuroimage*, 28(4), 757-762.
- 662 Mitchell, J. P., Heatherton, T. F., & Macrae, C. N. (2002). Distinct neural systems subserving person and object  
663 knowledge. *Proceedings of the National Academy of Sciences*, 99(23), 15238-15243.
- 664 Mittal, V. A., Tessner, K. D., McMillan, A. L., Delawalla, Z., Trotman, H. D., & Walker, E. F. (2006). Gesture  
665 behavior in unmedicated schizotypal adolescents. *Journal of Abnormal Psychology*, 115(2), 351.
- 666 Morris, R. W., Weickert, C. S., & Loughland, C. M. (2009). Emotional face processing in schizophrenia.  
667 *Current opinion in psychiatry*, 22(2), 140-146.
- 668 Nagels, A., Kircher, T., Grosvald, M., Steines, M., & Straube, B. (2018). Evidence for gesture-speech  
669 mismatch detection impairments in schizophrenia. *Psychiatry Res*, 273, 15-21.  
670 doi:10.1016/j.psychres.2018.12.107
- 671 Nagels, A., Kircher, T., Steines, M., Grosvald, M., & Straube, B. (2015a). A brief self-rating scale for the  
672 assessment of individual differences in gesture perception and production. *Learning and Individual*  
673 *Differences*, 39, 73-80.
- 674 Nagels, A., Kircher, T., Steines, M., & Straube, B. (2015b). Feeling addressed! The role of body orientation  
675 and co-speech gesture in social communication. *Hum Brain Mapp*, 36(5), 1925-1936.  
676 doi:10.1002/hbm.22746

- 677 Nahum, M., Fisher, M., Loewy, R., Poelke, G., Ventura, J., Nuechterlein, K. H., . . . Vinogradov, S. (2014). A  
678 novel, online social cognitive training program for young adults with schizophrenia: A pilot study.  
679 *Schizophrenia Research: Cognition*, 1(1), e11-e19.
- 680 Oldfield, R. C. (1971). The assessment and analysis of handedness: the Edinburgh inventory.  
681 *Neuropsychologia*, 9(1), 97-113.
- 682 Paivio, A. (2010). Dual coding theory and the mental lexicon. *The Mental Lexicon*, 5(2), 205-230.
- 683 Park, S., Matthews, N., & Gibson, C. (2008). Imitation, simulation, and schizophrenia. *Schizophrenia Bulletin*,  
684 34(4), 698-707.
- 685 Perlovsky, L. I., & Ilin, R. (2013). Mirror neurons, language, and embodied cognition. *Neural networks*, 41, 15-  
686 22.
- 687 Pulvermüller, F. (2005). Brain mechanisms linking language and action. *Nature Reviews Neuroscience*, 6(7),  
688 576-582. doi:10.1038/nrn1706
- 689 Pulvermüller, F., Shtyrov, Y., & Ilmoniemi, R. (2005). Brain signatures of meaning access in action word  
690 recognition. *Journal of Cognitive Neuroscience*, 17(6), 884-892.
- 691 Riedl, L., Nagels, A., Sammer, G., & Straube, B. (2020). A multimodal speech-gesture training intervention for  
692 patients with schizophrenia and its neural underpinnings—the study protocol of a randomized  
693 controlled pilot trial. *Frontiers in psychiatry*, 11, 110.
- 694 Rizzolatti, G., & Craighero, L. (2004). The mirror-neuron system. *Annual Review of Neuroscience*, 27, 169-  
695 192.
- 696 Sassenhagen, J., & Alday, P. M. (2016). A common misapplication of statistical inference: nuisance control  
697 with null-hypothesis significance tests. *Brain and Language*, 162, 42-45.
- 698 Saxe, R., & Powell, L. J. (2006). It's the thought that counts: specific brain regions for one component of  
699 theory of mind. *Psychological science*, 17(8), 692-699.
- 700 Sergi, M. J., Rassovsky, Y., Widmark, C., Reist, C., Erhart, S., Braff, D. L., . . . Green, M. F. (2007). Social  
701 cognition in schizophrenia: relationships with neurocognition and negative symptoms. *Schizophrenia*  
702 *Research*, 90(1-3), 316-324.
- 703 Slotnick, S. D. (2017). Resting-state fMRI data reflects default network activity rather than null data: A defense  
704 of commonly employed methods to correct for multiple comparisons. *Cognitive neuroscience*, 8(3),  
705 141-143.
- 706 Slotnick, S. D., Moo, L. R., Segal, J. B., & Hart Jr, J. (2003). Distinct prefrontal cortex activity associated with  
707 item memory and source memory for visual shapes. *Cognitive Brain Research*, 17(1), 75-82.
- 708 Stegmayer, K., Bohlhalter, S., Vanbellingen, T., Federspiel, A., Wiest, R., Müri, R. M., . . . Walther, S. (2018).  
709 Limbic interference during social action planning in schizophrenia. *Schizophrenia Bulletin*, 44(2), 359-  
710 368.
- 711 Straube, B., Green, A., Jansen, A., Chatterjee, A., & Kircher, T. (2010). Social cues, mentalizing and the neural  
712 processing of speech accompanied by gestures. *Neuropsychologia*, 48(2), 382-393.  
713 doi:10.1016/j.neuropsychologia.2009.09.025
- 714 Straube, B., Green, A., Sass, K., & Kircher, T. (2014). Superior temporal sulcus disconnectivity during  
715 processing of metaphoric gestures in schizophrenia. *Schizophr Bull*, 40(4), 936-944.  
716 doi:10.1093/schbul/sbt110
- 717 Straube, B., Green, A., Sass, K., Kirner-Veselinovic, A., & Kircher, T. (2013a). Neural integration of speech  
718 and gesture in schizophrenia: evidence for differential processing of metaphoric gestures. *Hum Brain*  
719 *Mapp*, 34(7), 1696-1712. doi:10.1002/hbm.22015
- 720 Straube, B., Green, A., Weis, S., & Kircher, T. (2012). A Supramodal Neural Network for Speech and Gesture

- 721           Semantics: An fMRI Study. *PLoS ONE*, 7(11), e51207. doi:ARTN e51207  
722 10.1371/journal.pone.0051207
- 723 Straube, B., He, Y., Steines, M., Gebhardt, H., Kircher, T., Sammer, G., & Nagels, A. (2013b). Supramodal  
724 neural processing of abstract information conveyed by speech and gesture. *Front Behav Neurosci*, 7,  
725 120. doi:10.3389/fnbeh.2013.00120
- 726 Straube, B., Wroblewski, A., Jansen, A., & He, Y. (2018). The connectivity signature of co-speech gesture  
727 integration: The superior temporal sulcus modulates connectivity between areas related to visual  
728 gesture and auditory speech processing. *Neuroimage*, 181, 539-549.
- 729 Thakkar, K. N., Peterman, J. S., & Park, S. (2014). Altered Brain Activation During Action Imitation and  
730 Observation in Schizophrenia: A Translational Approach to Investigating Social Dysfunction in  
731 Schizophrenia. *American Journal of Psychiatry*, 171(5), 539-548. doi:10.1176/appi.ajp.2013.13040498
- 732 Tzourio-Mazoyer, N., Landeau, B., Papathanassiou, D., Crivello, F., Etard, O., Delcroix, N., . . . Joliot, M.  
733 (2002). Automated anatomical labeling of activations in SPM using a macroscopic anatomical  
734 parcellation of the MNI MRI single-subject brain. *Neuroimage*, 15(1), 273-289.
- 735 Van Overwalle, F. (2009). Social cognition and the brain: a meta-analysis. *Human Brain Mapping*, 30(3), 829-  
736 858.
- 737 Vuilleumier, P., Armony, J. L., Driver, J., & Dolan, R. J. (2001). Effects of attention and emotion on face  
738 processing in the human brain: an event-related fMRI study. *Neuron*, 30(3), 829-841.
- 739 Walther, S., Alexaki, D. D., Stegmayer, K. D. L., Vanbellingen, T., & Bohlhalter, S. (2019). Conceptual  
740 disorganization impairs hand gesture performance in schizophrenia. *Schizophrenia Research*.
- 741 Walther, S., Eisenhardt, S., Bohlhalter, S., Vanbellingen, T., Müri, R., Strik, W., & Stegmayer, K. (2016).  
742 Gesture performance in schizophrenia predicts functional outcome after 6 months. *Schizophrenia*  
743 *Bulletin*, 42(6), 1326-1333.
- 744 Walther, S., Stegmayer, K., Sulzbacher, J., Vanbellingen, T., Müri, R., Strik, W., & Bohlhalter, S. (2015).  
745 Nonverbal social communication and gesture control in schizophrenia. *Schizophrenia Bulletin*,  
746 sbu222.
- 747 Walther, S., Vanbellingen, T., Müri, R., Strik, W., & Bohlhalter, S. (2013). Impaired pantomime in  
748 schizophrenia: association with frontal lobe function. *Cortex*, 49(2), 520-527.
- 749 Wang, L., & Chu, M. (2013). The role of beat gesture and pitch accent in semantic processing: an ERP study.  
750 *Neuropsychologia*, 51(13), 2847-2855.
- 751 Witteman, J., Van Heuven, V. J., & Schiller, N. O. (2012). Hearing feelings: a quantitative meta-analysis on the  
752 neuroimaging literature of emotional prosody perception. *Neuropsychologia*, 50(12), 2752-2763.
- 753 Wroblewski, A., He, Y., & Straube, B. (2020). Dynamic Causal Modelling suggests impaired effective  
754 connectivity in patients with schizophrenia spectrum disorders during gesture-speech integration.  
755 *Schizophrenia Research*, 216, 175-183.
- 756 Wurm, M. F., & Caramazza, A. (2019). Distinct roles of temporal and frontoparietal cortex in representing  
757 actions across vision and language. *Nature Communications*, 10(1), 1-10.

758  
759  
760  
761  
762  
763  
764
